## CORRIGENDUM

### AGAINST INTRINSIC INTERFERERS: A CRITIQUE OF KITTLE

BY SUNGHO CHOI

This article was originally published (*The Philosophical Quarterly* doi: 10.1093/pq/pqx004).

There was an error in the title. The word ‘interferers’ was misspelt. The correct title is given above. The title has also been corrected in the article.

*Kyung Hee University, South Korea*
